# Supplementary material
Source: PubMed Central journal article supplement (PMC2862120)
Supplement: NIHMS186360-supplement-1.pdf [file NIHMS186360-supplement-1.pdf]

**Supplemental Table 1:** Gene specific primer sequences used to analyze the mRNA expression.

| <b>Gene</b> | <b>Accession Number</b> | <b>Forward primer</b>  | <b>Reverse primer</b>   | <b>Product Size</b> |
|-------------|-------------------------|------------------------|-------------------------|---------------------|
| MMP-13      | NM_008607               | TCCCTGCCCCCTTCCCTATGG  | CTCGGAGCCTGTCAACTGTGG   | 157                 |
| RANKL       | NM_011613.3             | TTAGCATTTCAGGTGTCCAACC | CGTGGGCCATGTCTCTTAGTA   | 191                 |
| IBSP        | NM_008318.1             | AGGAGGCAAGCGTCACTGAAG  | TTTCTGACTGGTGGCGAGGTG   | 154                 |
| Lox         | NM_010728.2             | CATTCTTCTGCTGCGTGACAAC | CCCGACGGCGAGAAACCAG     | 129                 |
| Lumican     | NM_008524               | GAGTCCGTCCGTCCACTTCC   | CGAGACAGCATCCTCTTTGAGC  | 144                 |
| Kif5B       | NM_008448               | CAGGAACGGCTAAGGGTGGAG  | TTGCTTGTTCTCGTCTGTCTTGC | 106                 |
| Wif1        | NM_011915               | CCCGAAAGGTTACCAAGGAGAC | ACACTGGCACTTGTGGGTTTC   | 97                  |
| GAPDH       | NM_008084.2             | AGCCTCGTCCCCTAGACAAAA  | GATGACAAGCTTCCCATTCTCG  | 221                 |

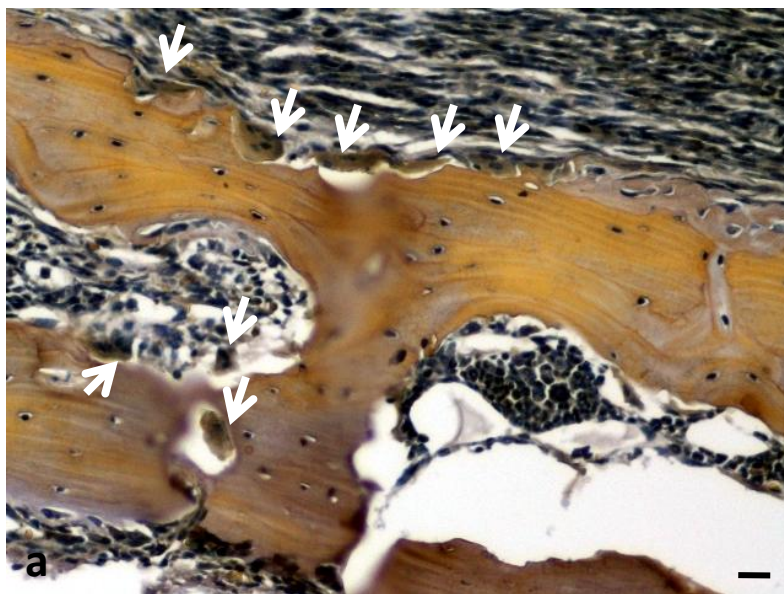

**Control-ASO**

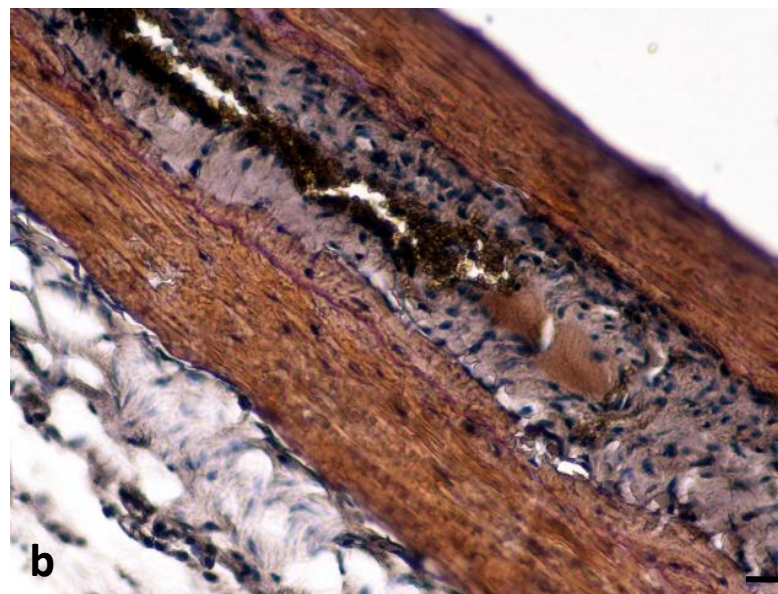

**MMP13-ASO**

**Supplementary Figure 1.** Multinucleated osteoclasts at the TB interface. Serial sections were stained for osteoclasts (arrows) using TRAP, a osteoclast marker. *Scale bars* 0.01 mm.
